# Supplementary material for: A novel hydrazide-based selective and sensitive optical chemosensor for the detection of Ni2+ ions: applications in live cell imaging, molecular logic gates and smart phone-based analysis
Source: Royal Society of Chemistry journal article supplement (doi:10.1039/c9dt02448d), 2019-01-01
Supplement: c9dt02448d1.pdf [file c9dt02448d1.pdf]

## Supporting Information

# Hydrazide based novel selective and sensitive optical chemosensor for the detection of Ni<sup>2+</sup>: Applications in living cell imaging, molecular logic gate and smart phone

Amit Kumar Manna,<sup>a</sup> Shubhamoy Chowdhury<sup>b</sup> and Goutam K. Patra<sup>a\*</sup>

<sup>a</sup>Department of Chemistry, Guru Ghasidas Vishwavidyalaya, Bilaspur (C.G), India

<sup>b</sup>Department of Chemistry, Gour Banga University, Malda, West Bengal 732 103, India

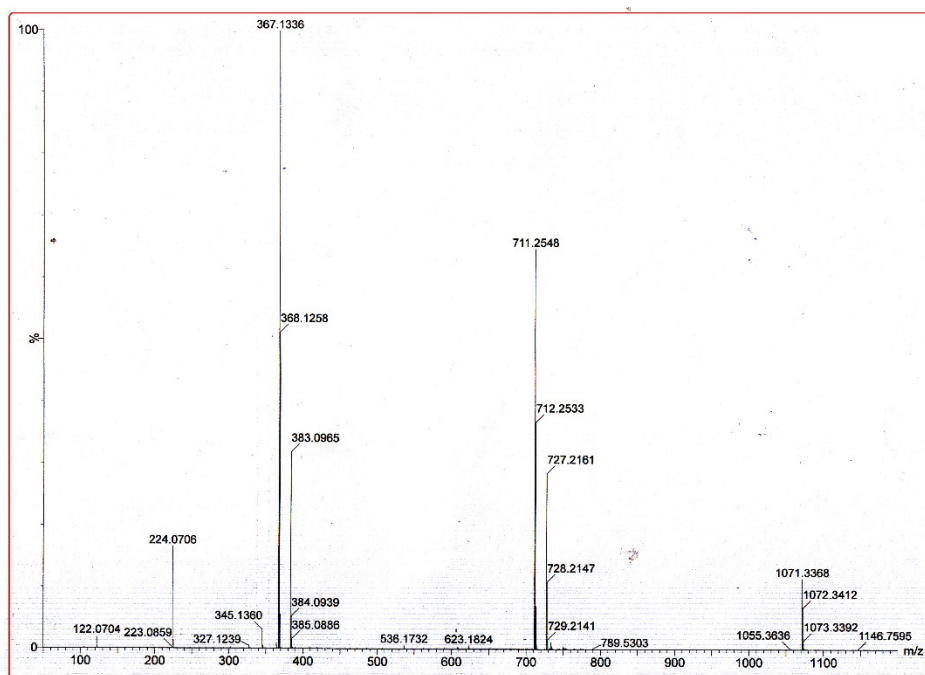

Fig. S1 ESI-mass spectra of L.

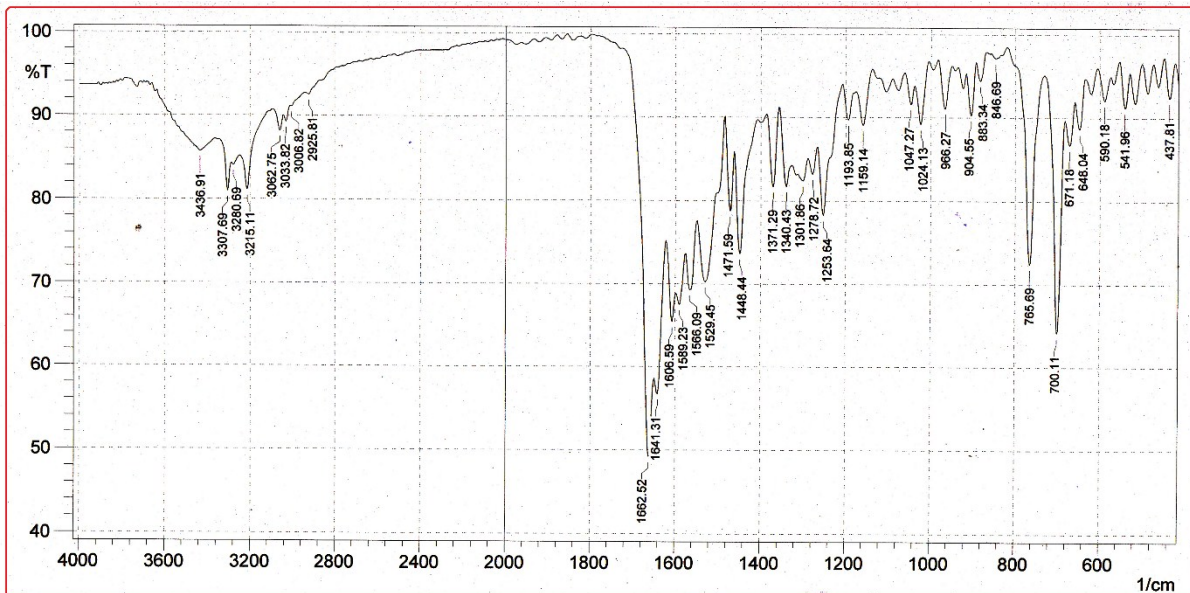

Fig. S2 FTIR spectra of L.

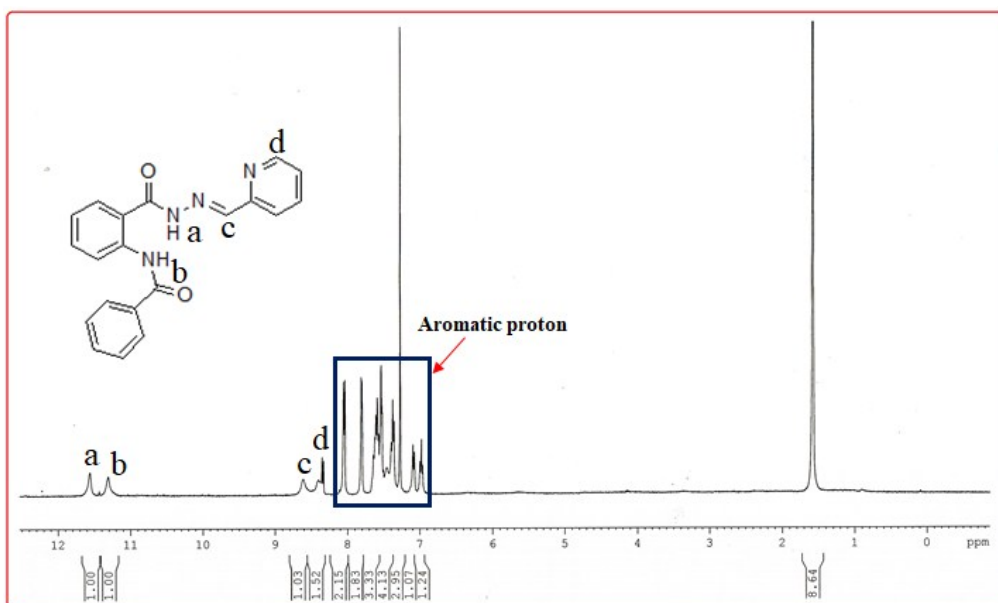

Fig. S3  $^1\text{H}$  NMR spectra of L.

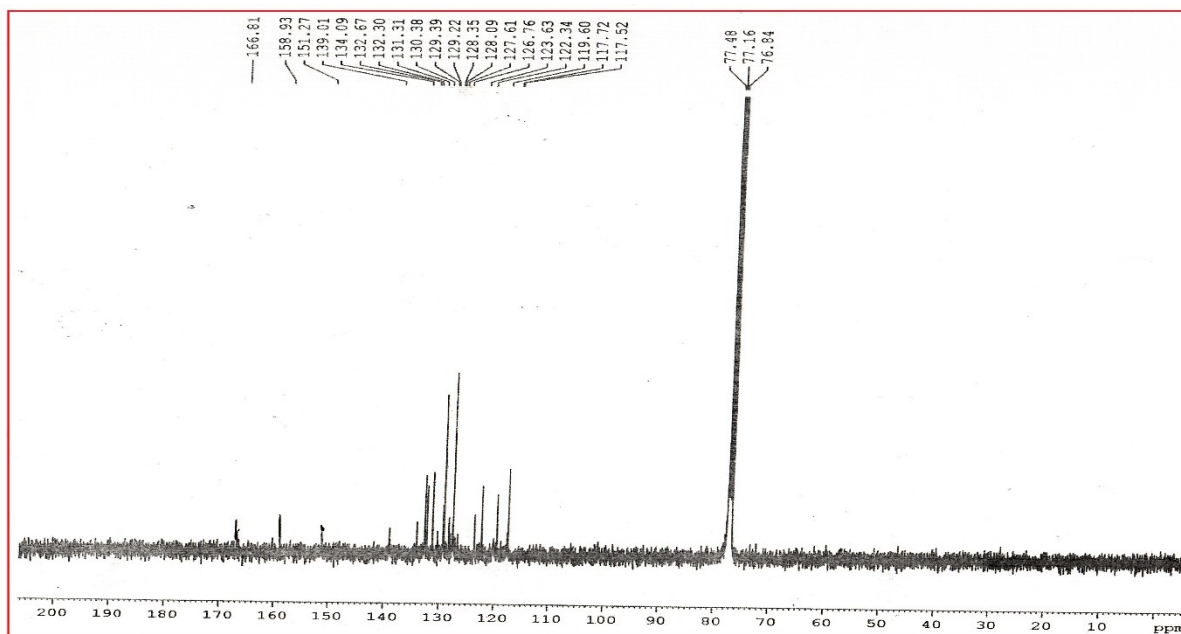

Fig. S4  $^{13}\text{C}$  NMR spectra of L.

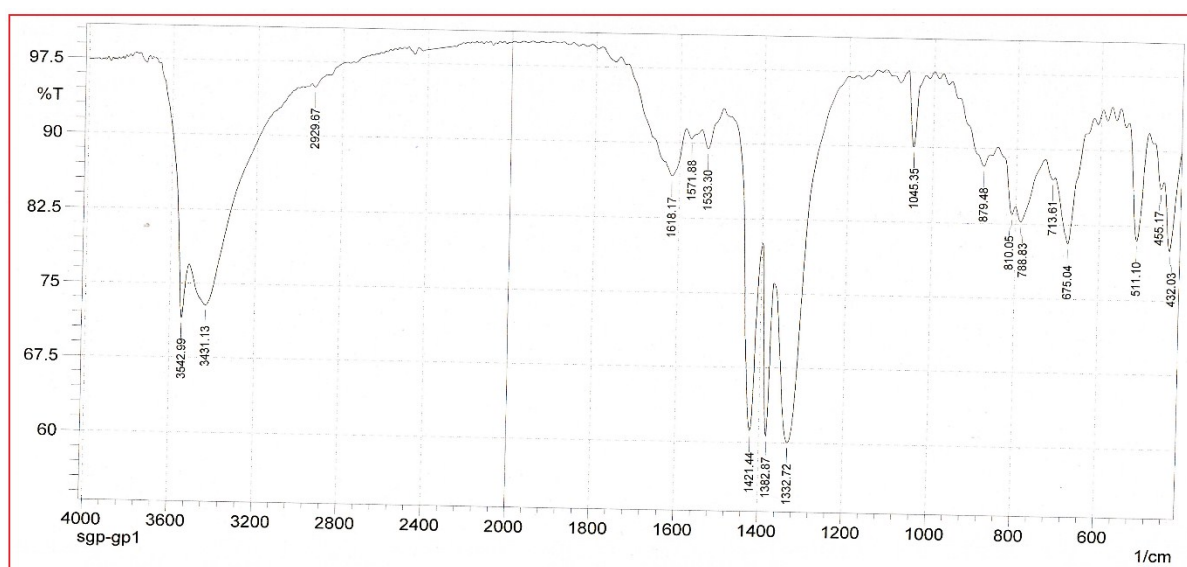

Fig. S5 IR spectra of L.

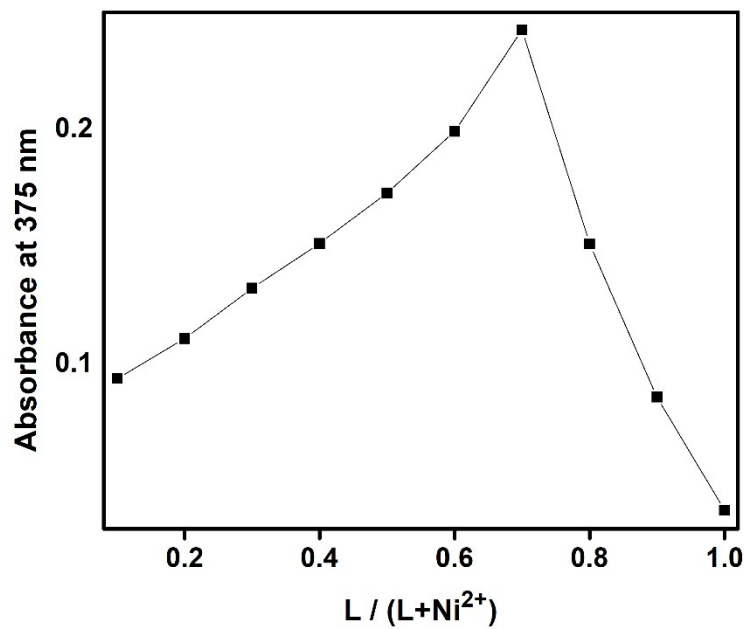

Fig. S6 Job's plot.

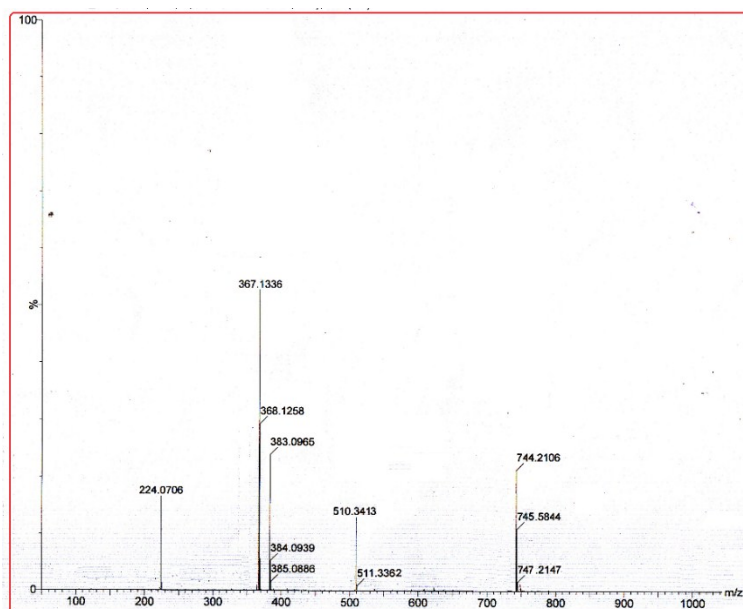

Fig. S7 ESI-mass spectra of  $L-Ni^{2+}$ .

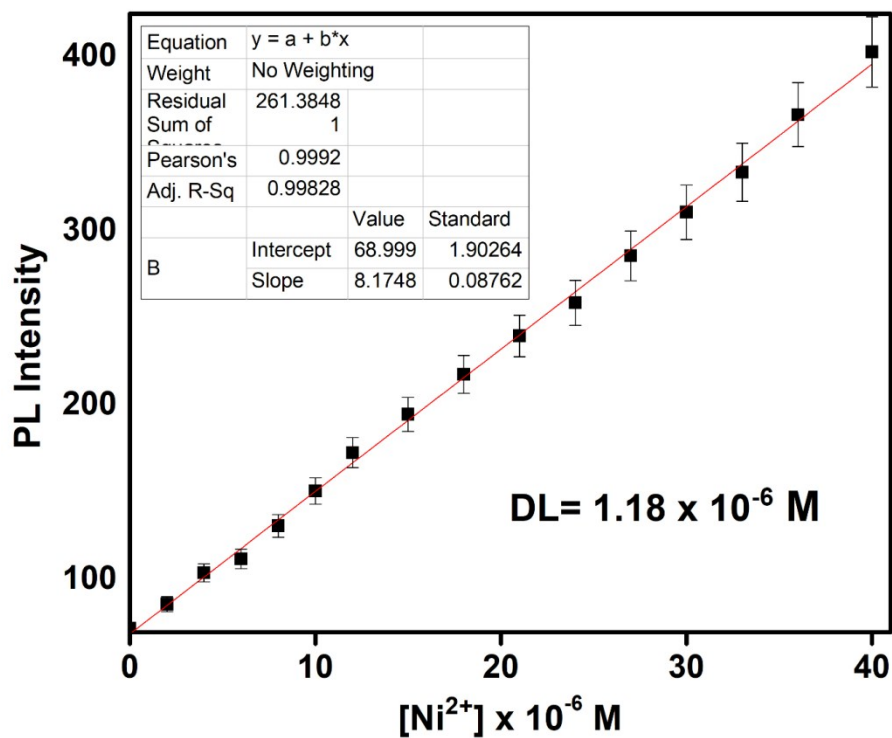

Fig. S8 Fluorometric Detection limit of L in presence of Ni<sup>2+</sup>.

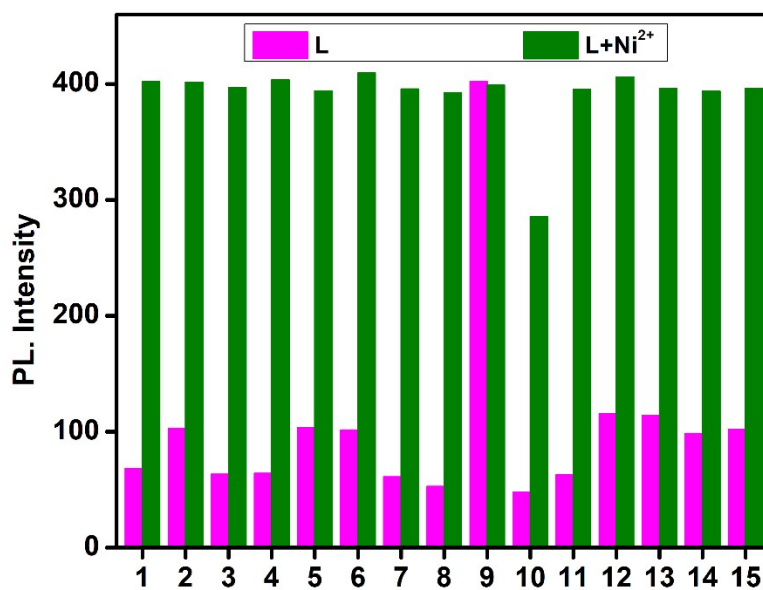

Fig. S9 Competitive experiment in presence of L and other metal ions (where 1 = L, 2 = Co<sup>2+</sup>, 3 = Ag<sup>+</sup>, 4 = Fe<sup>3+</sup>, 5 = Cd<sup>2+</sup>, 6 = Al<sup>3+</sup>, 7 = Hg<sup>2+</sup>, 8 = Fe<sup>2+</sup>, 9 = Ni<sup>2+</sup>, 10 = Cu<sup>2+</sup>, 11 = Cr<sup>3+</sup>, 12 = Mn<sup>2+</sup>, 13 = Zn<sup>2+</sup>, 14 = Pd<sup>2+</sup> and 15 = Pt<sup>2+</sup>)

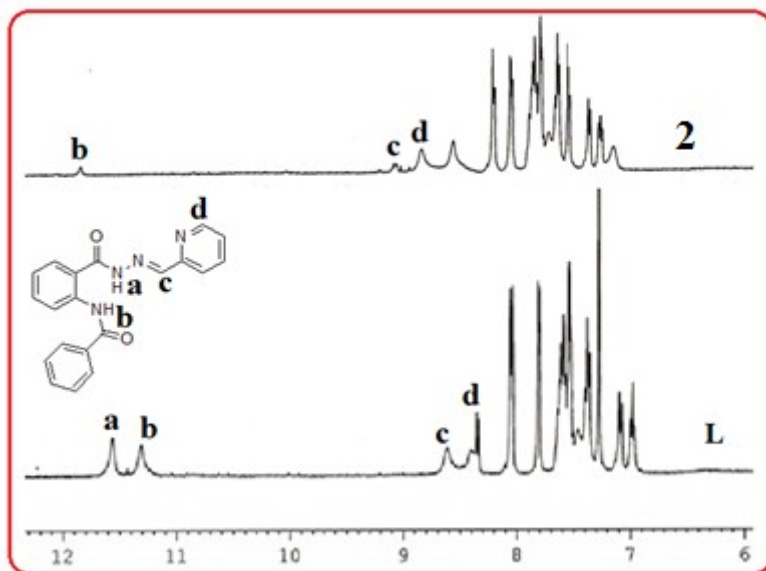

Fig. S10 Partial  $^1\text{H}$  NMR Spectra of **L** and **2** in  $\text{CDCl}_3$ .

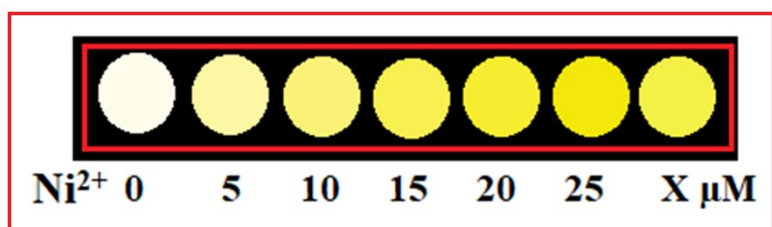

Fig. S11 Smartphone based image using RGB grabber.

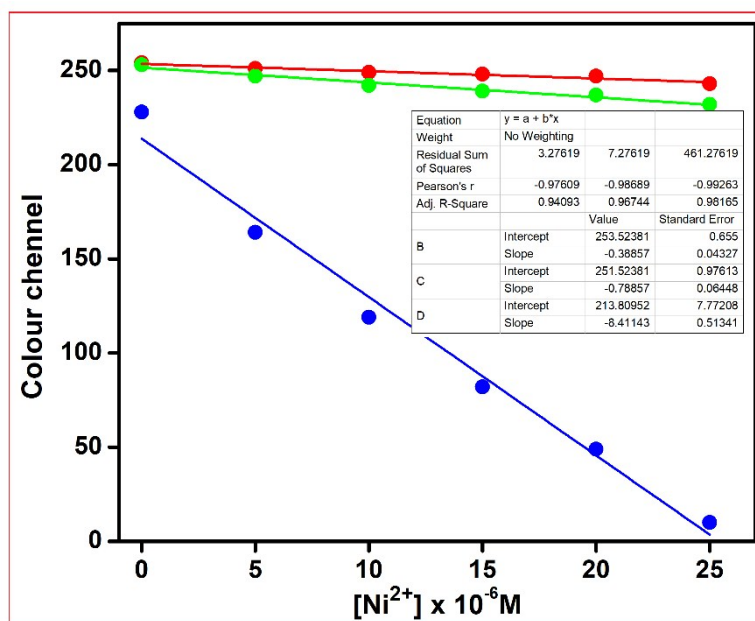

Fig. S12 Plot of red, green and blue colour channel level of signal images obtained from smartphone.

**Table S1** Selected matrix parameters for X-ray and geometry optimized structures of **L** and **NiL<sub>2</sub>.H<sub>2</sub>O (2.H<sub>2</sub>O)**

| <b>L</b>        | Experimental | Optimized | <b>NiL<sub>2</sub>.H<sub>2</sub>O<br/>(2.H<sub>2</sub>O)</b> | Experimental | Optimized |
|-----------------|--------------|-----------|--------------------------------------------------------------|--------------|-----------|
| Bond length (Å) |              |           | Bond length (Å)                                              |              |           |
| N006-C00e       | 1.343(2)     | 1.3647    | Ni1-O2                                                       | 2.078(4)     | 2.0241    |
| C00e-C009       | 1.462(3)     | 1.4705    | Ni1-O5                                                       | 2.086(3)     | 2.1008    |
| C009-N004       | 1.273(2)     | 1.3023    | Ni1-N3                                                       | 1.958(4)     | 1.8987    |
| N004-N003       | 1.373(2)     | 1.3806    | Ni1-N9                                                       | 1.965(3)     | 1.9448    |
| N003-C007       | 1.353(2)     | 1.3837    | Ni1-N4                                                       | 2.084(4)     | 2.0212    |
| C007-O002       | 1.219(2)     | 1.2442    | Ni1-N10                                                      | 2.106(3)     | 2.1641    |
| C007-C00a       | 1.494(3)     | 1.4956    | O2-C14                                                       | 1.260(5)     | 1.2942    |
| C00a-C00c       | 1.407(3)     | 1.4368    | O5-C27                                                       | 1.261(5)     | 1.2823    |
| C00c-N005       | 1.401(2)     | 1.4074    | N2-C14                                                       | 1.335(6)     | 1.3625    |
| N005-C00b       | 1.350(2)     | 1.3884    | N5-C27                                                       | 1.331(6)     | 1.3674    |
| C00b-O001       | 1.232(2)     | 1.2619    | N2-N3                                                        | 1.371(6)     | 1.3697    |
| C00b-C008       | 1.490(2)     | 1.5071    | N5-N9                                                        | 1.374(5)     | 1.3842    |
| C008-C00g       | 1.386(3)     | 1.4157    | N3-C15                                                       | 1.276(6)     | 1.314     |
|                 |              |           | N9-C26                                                       | 1.255(5)     | 1.2947    |
|                 |              |           | C15-C16                                                      | 1.459(6)     | 1.4545    |
|                 |              |           | C25-C26                                                      | 1.452(6)     | 1.4618    |
|                 |              |           | N4 -C16                                                      | 1.351(6)     | 1.3681    |
|                 |              |           | N5-C27                                                       | 1.331(6)     | 1.3701    |
| Bond angle (°)  |              |           | Bond angle (°)                                               |              |           |
| N006-C00e-C009  | 114.50(16)   | 114.939   | O2-Ni1-N3                                                    | 75.77(13)    | 77.383    |
| C00e-C009-N004  | 120.85(16)   | 120.809   | O5-Ni1-N9                                                    | 76.84(11)    | 75.557    |
| C009-N004-N003  | 114.90(15)   | 117.583   | N3-Ni1-N4                                                    | 79.35(15)    | 82.657    |
| N004-N003-C007  | 119.81(14)   | 120.273   | N9-Ni1-N10                                                   | 78.15(14)    | 74.573    |
| N003-C007-O002  | 122.52(17)   | 121.108   | N4-C16-C15                                                   | 114.9(4)     | 113.903   |
| N003-C007-C00a  | 114.58(15)   | 115.712   | N10-C25-C26                                                  | 114.3(3)     | 118.728   |
| C007-C00a-C00c  | 120.40(15)   | 120.568   | C16-C15-N3                                                   | 115.7(4)     | 113.572   |
| C00a-C00c-N005  | 118.70(15)   | 118.685   | C25-C26-N9                                                   | 116.4(4)     | 120.375   |
| C00c-N005-C00b  | 128.49(15)   | 128.601   | C15-N3-N2                                                    | 121.0(4)     | 123.952   |
| N005-C00b-O001  | 122.89(16)   | 123.346   | C26-N9-N5                                                    | 122.5(3)     | 118.989   |
| O001-C00b -C008 | 121.31(14)   | 120.985   | N3-N2-C14                                                    | 108.3(4)     | 108.398   |
|                 |              |           | N9-N5-C27                                                    | 109.1(4)     | 114.392   |
|                 |              |           | N2-C14-O2                                                    | 123.9(4)     | 120.563   |
|                 |              |           | N5-C27-O5                                                    | 125.1(4)     | 123.428   |
